# Supplementary material for: Transcriptional Regulation of the Capsular Polysaccharide Biosynthesis Locus of Streptococcus Pneumoniae: a Bioinformatic Analysis
Source: PubMed Central journal article supplement — DNA Res. 2009 May 8;16(3):177–86. doi: 10.1093/dnares/dsp007 (PMC2695774; doi:10.1093/dnares/dsp007), 2009-05-08
Supplement: dsp007_1.pdf [file dsp007_1.pdf]

**Supplemental Figure S1.** Organization of pneumococcal CPS gene clusters and their surrounding regions. Type-specific genes are shadowed in gray whereas genes unrelated to CPS biosynthesis are showed as open arrows. Thick and thin arrows represent genes or pseudogenes, respectively. With the exception of type-specific genes, regions showing more than 90% identical nucleotides when comparing sequences of different serotypes, are represented by identical color and shading. Curved arrows indicate promoter regions. The inverted matchsticks represent putative transcriptional terminators.

**Supplemental Figure S2.** Schematic representation of the different sequence organizations (SO) of the DNA region spanning from the termination codon of *dexB* to the initiation codon of *cpsA* in Wzy-dependent CPS of *S. pneumoniae*. DNA regions present in some (but not all) sequence organizations are depicted as blue boxes, solid arrows, etc. Identical shading represents DNA regions showing more than 95% identical nucleotides. Small, black and red vertical bars inside a green rectangle indicate, respectively, the position of the  $-35$  and  $-10$  promoter boxes. The solid straight arrows correspond to a 163-bp fragment of an *aliB*-like gene.

**Supplemental Figure S3.** Multiple alignment of the conserved sequences located upstream of *cpsA* (A and B) or *cps3A* (C). Multiple gene sequence alignments were conducted using the CLUSTAL W 2.0 program (<http://www.ebi.ac.uk/Tools/clustalw2/>). Each sequence is identified by its accession number. Serotypes are indicated in parentheses. Asterisks indicate nucleotides identical in all the sequences. Polymorphic positions are shadowed with different colors. Hyphens correspond to deletions introduced to maximize similarity. Eighty six (A), 115 (B), or 4 sequences (C) were aligned. In B and C, the  $-35$  ad  $-10$  boxes of the *cps* promoter are boxed and the transcription initiation site is indicated with white lettering in a black background. The T to C transition at position  $-8$  in the unencapsulated R6 strain (AE008412) has been recently confirmed.<sup>1</sup> However, the existence of minor errors in some sequences cannot be completely discarded. The initiation codon of *cpsA* and *cps3A* is shadowed in gray.

**Supplemental Figure S4.** Organization of the CPS gene cluster of type 3 pneumococci of the DNA region spanning from the termination codon of *dexB* to the initiation codon of *cps3A*. Regions showing more than 90% identical nucleotides are represented by identical color and shading. Thick and thin arrows represent genes or pseudogenes, respectively. The sequence organization of SO\_1 serotypes is shown for comparison. Small, black and red vertical bars indicate, respectively, the position of the –35 and –10 promoter boxes.

## References

1. Lanie, J. A., Ng, W.-L., Kazmierczak, K. M., *et al.* 2007, Genome sequence of Avery's virulent serotype 2 strain D39 of *Streptococcus pneumoniae* and comparison with that of unencapsulated laboratory strain R6, *J. Bacteriol.*, **189**, 38–51.

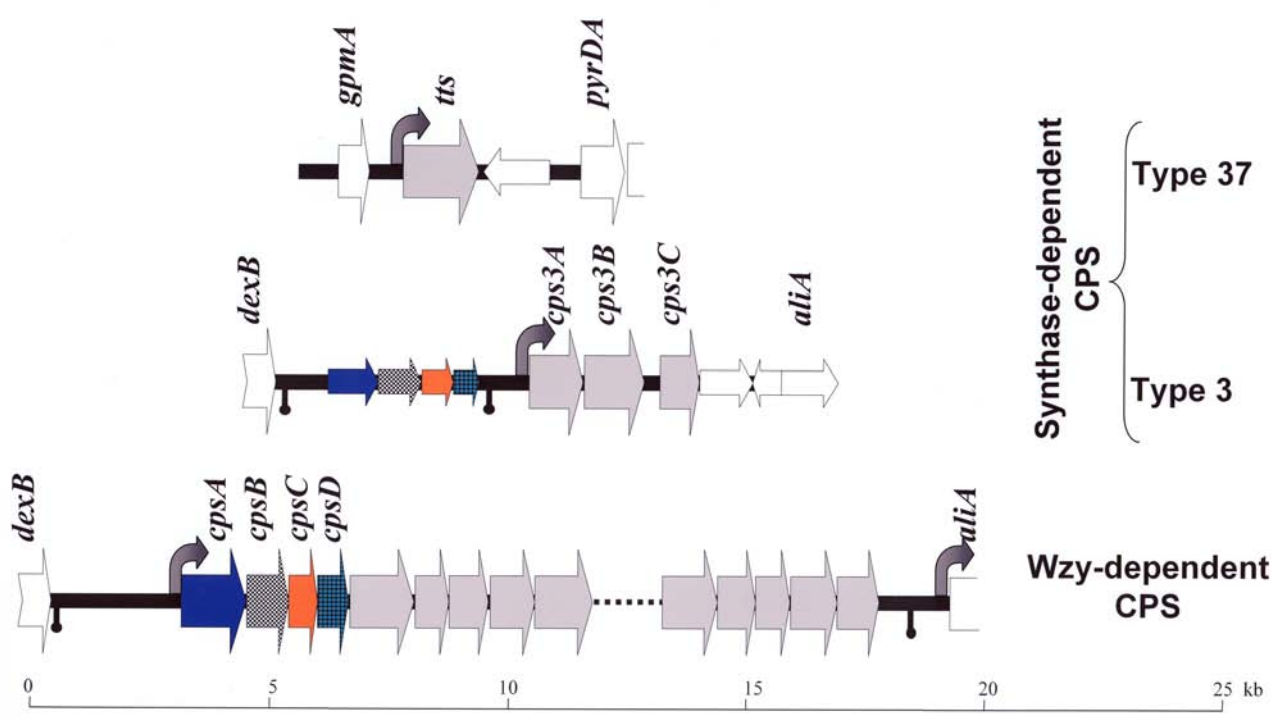

0 150 300 450 600 750 900 1050 1200 1350 1500 bp

← IS630\_Spn1 →

**SO**

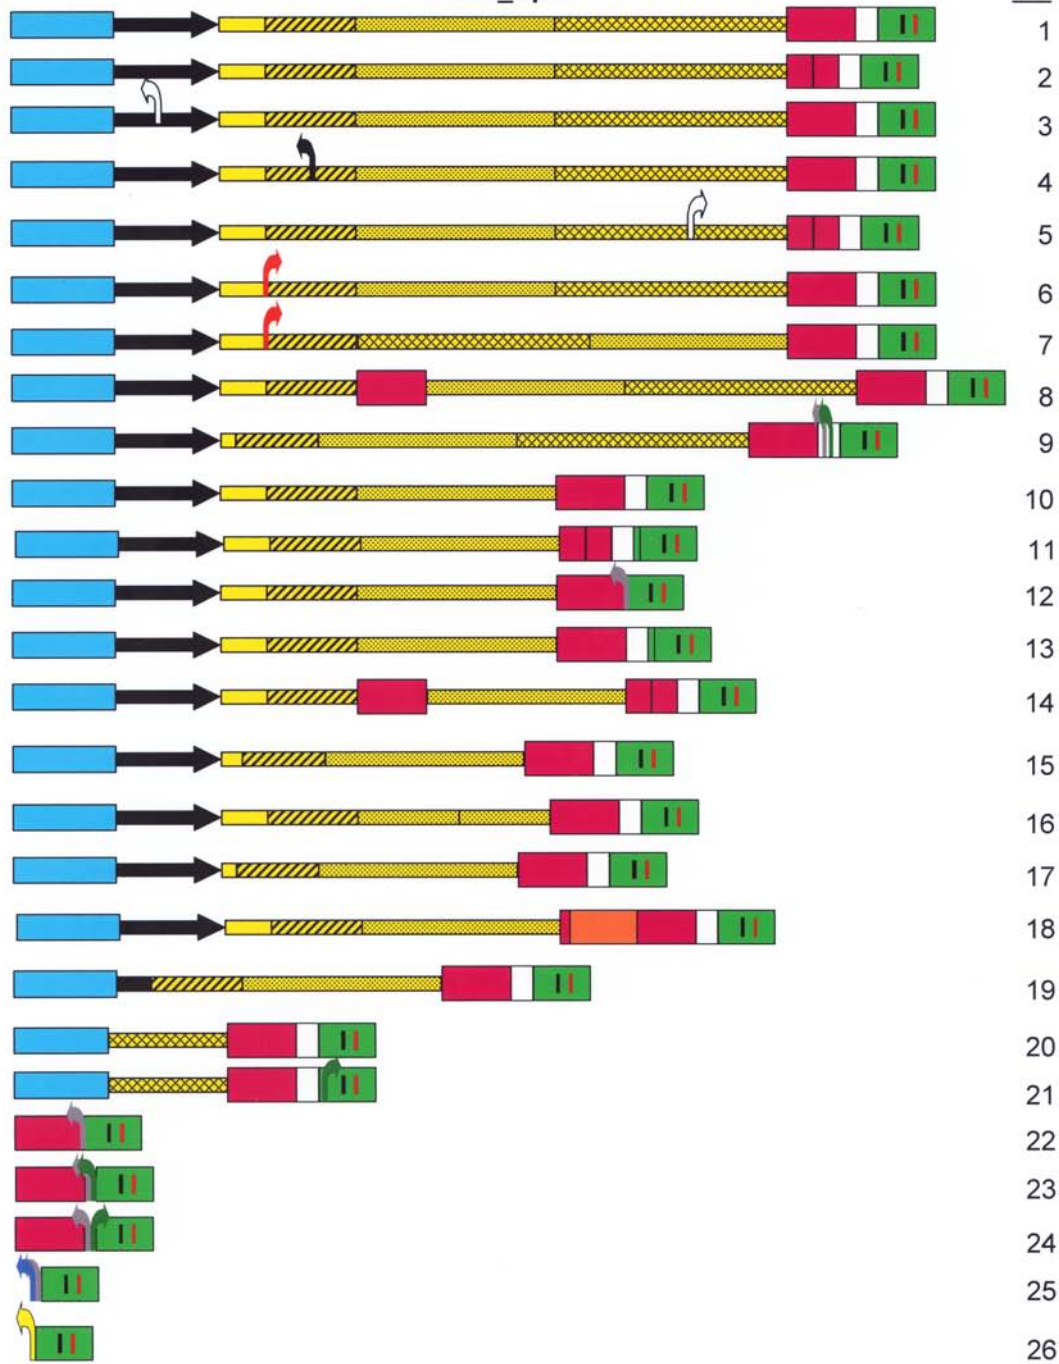

IS1380 
 IS1167 
 Intron 
 IS1202 
 IS1239 
 IS660 
 IS3\_Spn1 
 RUP\_A 
 DNA fragment encoding a phage integrase family protein; PF00589





C

```
247210 -121 GGAACACAGAGGTTAGGAAAGTAATCAGTTTAAACGGGATATCTTTCAAAGCTGATACTAAGGCACAAAAAAGTTTGATATTCGCC -35
CR931634 GGAACACAGAGGTTAGGAAAGTAATAGTTTAAACGGGATATCTTTCAAAGCTGATACTAAGGCACAAAAAAGTTTGATATTCGCC
U15171 GGAACACAGAGGTTAGGAAAGTAATCAGTTTAAACGGGATATCTTTCAAAGCTGATACTAAGGCACAAAAAAGTTTGATATTCGCC
NZ_AA2201000001 GGAACACAGAGGTTAGGAAAGTAATAGTTTAAACGGGATATCTTTCAAAGCTGATACTAAGGCACAAAAAAGTTTGATATTCGCC
*****
247210 -34 TTGACATAGATAAAATTATTATATAATTTAAACTTTTGCTTTTAAATAAAGTGAGAATATTAATAATGCAGAGAAAGAGGACTGTAGTAAATG +61
CR931634 TTGACATAGATAAAATTATTATATAATTTAAACTTTTGCTTTTAAATAAAGTGAGAATATTAATAATGCAGAGAAAGAGGACTGTAGTAAATG
U15171 TTGACATAGATAAAATTATTATATAATTTAAACTTTTGCTTTTAAATAAAGTGAGAATATTAATAATGCAGAGAAAGAGGACTGTAGTAAATG
NZ_AA2201000001 TTGACATAGATAAAATTATTATATAATTTAAACTTTTGCTTTTAAATAAAGTGAGAATATTAATAATGCAGAGAAAGAGGACTGTAGTAAATG
*****
```

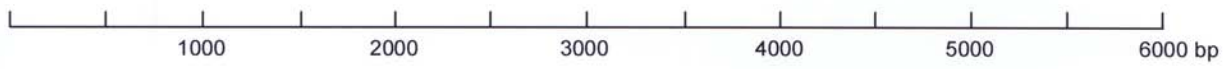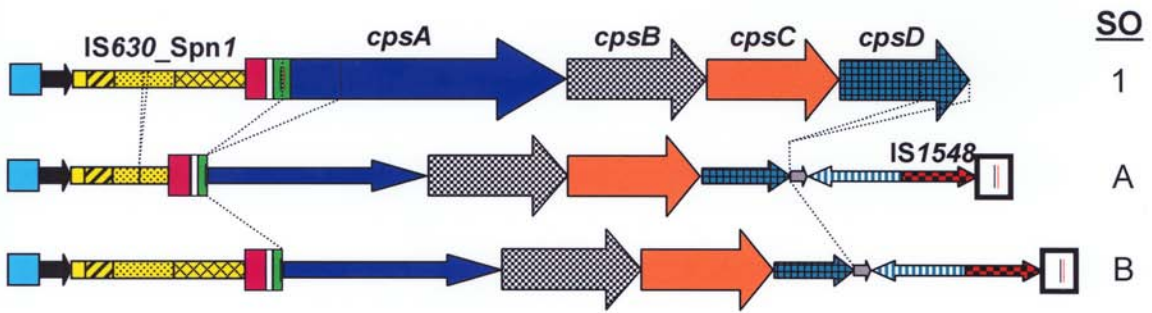



**Supplemental Table S1.** *cps* gene clusters of *S. pneumoniae* analyzed in this study

| Serotype       | Strain <sup>a</sup> | Accession No.   | SO <sup>b</sup> |
|----------------|---------------------|-----------------|-----------------|
| 1              | 13868               | Z83335          | 4               |
|                | 519/43              | CR931632        | 4               |
| 2              | R6                  | AE008412        | 1               |
|                | D39                 | AF026471        | 1               |
|                | pn2L                | CR931633        | 8               |
| 3 <sup>c</sup> | 406                 | Z47210          | A               |
|                | 524/62              | CR931634        | B               |
|                | SP3-BS71            | NZ_AAZZ01000001 | A               |
| 4              | TIGR4               | AE005672        | 3               |
|                | WCH35               | AF316639        | 1               |
|                | 600/62              | CR931635        | 1               |
| 6A             | 34351=Rodrigues     | CR931638        | 18              |
|                | SP6-BS73            | NZ_ABAA01000001 | 10              |
| 6B             | WCH18               | AF316640        | 10              |
|                | 2626/39             | CR931639        | 10              |
| 6C             | CHPA388             | EF538714        | 1               |
| 7A             | 2040/37             | CR931640        | 1               |
| 7B             | Johnson             | CR931641        | 13              |
| 7C             | Sutcliff            | CR931642        | 22              |
| 7F             | 554/62              | CR931643        | 1               |
| 8              | WCH56               | AF316641        | 1               |
|                | 6028/1995           | AJ239004        | 1               |
|                | 573/62              | CR931644        | 1               |
| 9A             | Wilder              | CR931645        | 2               |
| 9L             | T9233/128/68        | CR931646        | 22              |
| 9N             | 533/62              | CR931647        | 22              |
| 9V             | 980/68              | CR931648        | 22              |
| 10A            | 10061/38            | CR931649        | 17              |
| 10B            | 423/82              | CR931650        | 10              |
| 10C            | Gro Norge           | CR931651        | 15              |
| 10F            | 34355               | CR931652        | 10              |
| 11A            | 1813/39             | CR931653        | 25              |
| 11B            | 8087/40             | CR931654        | 1               |
| 11C            | Eddy nr. 53         | CR931655        | 24              |
| 11D            | 79/86               | CR931656        | 22              |
|                | SP11-BS70           | NZ_ABAC01000001 | 22              |
|                | 34356               | CR931657        | 22              |
| 12A            | 559/66              | CR931658        | 5               |
| 12B            | Gambia 1/81         | CR931659        | 10              |
| 12F            | 6312                | CR931660        | 10              |
| 13             | 34357               | CR931661        | 2               |
| 14             | NCTC 11902          | X85787          | 10              |
|                | 34359               | CR931662        | 10              |
|                | SP14-BS69           | NZ_ABAD01000001 | 10              |
| 15A            | 389/39              | CR931663        | 10              |
| 15B            | 7904/39             | CR931664        | 10              |

|     |              |                 |    |
|-----|--------------|-----------------|----|
| 15C | 553/62       | CR931665        | 10 |
| 15F | 688/63       | CR931666        | 1  |
| 16A | R105         | CR931667        | 11 |
| 16F | 34361        | CR931668        | 1  |
| 17A | 4704         | CR931669        | 20 |
| 17F | Rose         | CR931670        | 2  |
| 18A | 8609/43      | CR931671        | 14 |
| 18B | 1033/41      | CR931672        | 10 |
| 18C | WCH94        | AF316642        | 10 |
|     | 4593/40      | CR931673        | 10 |
|     | SP18-BS74    | NZ_ABAE01000002 | 26 |
| 18F | Gethens      | CR931674        | 1  |
| 19A | 1777/39      | AF094575        | 22 |
|     | 19A2         | AF105112        | 10 |
|     | 141/68       | CR931675        | 22 |
| 19B | –            | AF105114        | 22 |
|     | 4594         | CR931676        | 10 |
| 19C | –            | AF105115        | 23 |
|     | 7588/39      | CR931677        | 23 |
| 19F | SSZ          | U04047          | 12 |
|     | NCTC 11906   | AF030367        | 7  |
|     | SP-496       | AF030368        | 10 |
|     | SP-VA92      | AF030369        | 10 |
|     | SP-GA71      | AF030370        | 10 |
|     | PO-329       | AF030371        | 8  |
|     | SP-VA96      | AF030372        | 10 |
|     | 485/61       | CR931678        | 6  |
| 20  | 34365        | CR931679        | 2  |
| 21  | 546/62       | CR931680        | 1  |
| 22A | 3405/39      | CR931681        | 16 |
| 22F | 1772/40      | CR931682        | 16 |
| 23A | 1196/45      | CR931683        | 10 |
| 23B | 1039/41      | CR931684        | 25 |
| 23F | SP-264       | AF030373        | 10 |
|     | UK-577       | AF030374        | 10 |
|     | Him18        | AF057294        | 22 |
|     | Dr. Melchior | CR931685        | 22 |
|     | SP23-BS72    | NZ_ABAG01000001 | 22 |
| 24A | 2748/40      | CR931686        | 21 |
| 24B | 2236/42      | CR931687        | 1  |
| 24F | 24F L        | CR931688        | 22 |
| 27  | 34371        | CR931691        | 10 |
| 28A | 1982/45      | CR931692        | 16 |
| 28F | 34372        | CR931693        | 10 |
| 29  | 34373        | CR931694        | 10 |
| 31  | 34374        | CR931695        | 1  |
| 32A | 2813/41      | CR931696        | 9  |
| 32F | 34375        | CR931697        | 9  |
| 33A | Biehl        | CR931698        | 10 |
| 33B | E294         | CR931699        | 1  |

|     |             |          |    |
|-----|-------------|----------|----|
| 33C | 7098/41     | CR931700 | 10 |
| 33D | CSF/79      | CR931701 | 1  |
| 33F | SSISP33F    | AJ006986 | 10 |
|     | 3084/37     | CR931702 | 10 |
| 34  | 676/74      | CR931703 | 1  |
| 35A | 1936/39     | CR931704 | 10 |
| 35B | 4356/39     | CR931705 | 10 |
| 35C | 7765/43     | CR931706 | 2  |
| 35F | 361/39      | CR931707 | 22 |
| 36  | 1095/39     | CR931708 | 22 |
| 39  | 203/40      | CR931711 | 10 |
| 40  | Colemore    | CR931712 | 22 |
| 41A | 6803        | CR931713 | 1  |
| 41F | 8211/40     | CR931714 | 22 |
| 42  | 198/71      | CR931715 | 2  |
| 43  | 2427/48     | CR931716 | 19 |
| 44  | Hammer      | CR931717 | 10 |
| 45  | Eddy nr. 72 | CR931718 | 1  |
| 46  | Eddy nr. 73 | CR931719 | 10 |
| 47A | L351        | CR931720 | 2  |
| 47F | Eddy nr. 52 | CR931721 | 2  |
| 48  | 656/63      | CR931722 | 19 |

<sup>a</sup> The sequences (either complete or partial) of the *cps* loci compared were obtained from the EMBL/GenBank/DDBJ databases (5 January 2009; last date accessed). Among them, only those including in a continuous sequence both the termination codon of *dexB* and the initiation codon of *cpsA* were analyzed further. For the reasons mentioned above, two isolates of serotype 37 (AJ131984 and CR931709) were not considered here. Neither did we include sequences corresponding to serotypes 25A (accession number CR931689), 25F (CR931690), and 38 (CR931710) since the first four genes of their *cps* loci, which are very similar, are interrupted by a transposase gene and rearranged in order. We also excluded from the analysis the sequences of two serotype 5 isolates (AY336008 and CR931636/CR931637) due to the probable existence of gene reorganizations at the *cps* locus. For reasons already described, serotype 3 sequences were analyzed separately from Wzy-polymerase-dependent capsular serotypes.

<sup>b</sup> SO, sequence organization.

<sup>c</sup> For clarity, SO of serotype 3 strains is designated as A or B.

**Supplemental Table S2.** Proven and putative streptococcal operators analyzed in this study

| Organism                   | Transcriptional regulator | Operator                           | Pneumococcal ortholog                   | Reference |
|----------------------------|---------------------------|------------------------------------|-----------------------------------------|-----------|
| <i>S. pneumoniae</i>       | AdcR                      | TAACYRGTTAA                        | —                                       | 1         |
|                            | CiaR                      | TTTAAGN <sub>5</sub> TTTAAG        | —                                       | 2         |
|                            | CodY                      | AATTTTCWGAAAATT                    | —                                       | 3, 4      |
|                            | ComE                      | ACACTTTGGN <sub>12</sub> ACAGTTGAG | —                                       | 5         |
|                            | ComX1                     | TACGAATA                           | —                                       | 6, 7      |
|                            | CopY                      | KACAN <sub>2</sub> TGTA            | —                                       | 8, 9      |
|                            | FabT                      | RYTTTGAYTGTMAAAKT                  | —                                       | 10        |
|                            | GlnR                      | TGTNAN <sub>7</sub> TNACA          | —                                       | 11        |
|                            | MalR                      | AAACGTTT                           | —                                       | 12        |
|                            | NmlR                      | CTTGAGN <sub>4</sub> CTCAAAG       | —                                       | 13        |
|                            | PsaR                      | AAAATTAAN <sub>6</sub> TTAATTTT    | —                                       | 14-16     |
|                            | RitR                      | WNATTANW <sub>3</sub> RWYRR        | —                                       | 17        |
|                            | SczA                      | TG TTCAGWAWTGAAYA                  | —                                       | 18        |
|                            | SpxR                      | ATAGAGAATAGAGA                     | —                                       | 19        |
|                            | <i>S. agalactiae</i>      | RovS                               | AWAAWVHTDAWN <sub>6/7</sub> WTKWWAMDWAK | SPD_0939  |
| <i>S. mutans</i>           | HrcA                      | TTAGCACTCN <sub>9</sub> GAGTGCTAA  | SPD_0458                                | 21-23     |
| <i>S. pyogenes</i>         | CovR/CsrR                 | DDHHATTARAR                        | SPD_0344                                | 24, 25    |
| <i>S. suis/S. gordonii</i> | ArcR                      | WNTGAATW <sub>4</sub> ATTCA        | SPD_0786                                | 26-28     |

## References

1. Panina, E. M., Mironov, A. A. and Gelfand, M. S. 2003, Comparative genomics of bacterial zinc regulons: enhanced ion transport, pathogenesis, and rearrangement of ribosomal proteins, *Proc. Natl. Acad. Sci. USA*, **100**, 9912–9917.
2. Halfmann, A., Kovács, M., Hakenbeck, R. and Brückner, R. 2007, Identification of the genes directly controlled by the response regulator CiaR in *Streptococcus pneumoniae*: five out of 15 promoters drive expression of small non-coding RNAs, *Mol. Microbiol.*, **66**, 110–126.
3. den Hengst, C. D., van Hijum, S. A. F. T., Geurts, J. M. W., Nauta, A., Kok, J. and Kuipers, O. P. 2005, The *Lactococcus lactis* CodY regulon: Identification of a conserved *cis*-regulatory element, *J. Biol. Chem.*, **280**, 34332–34342.
4. Hendriksen, W. T., Bootsma, H. J., Estevão, S., *et al.* 2008, CodY of *Streptococcus pneumoniae*: link between nutritional gene regulation and colonization, *J. Bacteriol.*, **190**, 590-601.
5. Ween, O., Gaustad, P. and Håvarstein, L. S. 1999, Identification of DNA binding sites for ComE, a key regulator of natural competence in *Streptococcus pneumoniae*, *Mol. Microbiol.*, **33**, 817–827.
6. Lee, M. S. and Morrison, D. A. 1999, Identification of a new regulator in *Streptococcus pneumoniae* linking quorum sensing to competence for genetic transformation, *J. Bacteriol.*, **181**, 5004–5016.
7. Luo, P., Li, H. and Morrison, D. A. 2003, ComX is a unique link between multiple quorum sensing outputs and competence in *Streptococcus pneumoniae*, *Mol. Microbiol.*, **50**, 623–633.
8. Portmann, R., Poulsen, K. R., Wimmer, R. and Solioz, M. 2006, CopY-like copper inducible repressors are putative ‘winged helix’ proteins, *BioMetals*, **19**, 61–70.
9. Reyes, A., Leiva, A., Cambiazo, V., Méndez, M. A. and González, M. 2006, *Cop*-like operon: Structure and organization in species of the *lactobacillale* order, *Biol. Res.*, **39**, 87–93.
10. Lu, Y.-J. and Rock, C. O. 2006, Transcriptional regulation of fatty acid biosynthesis in *Streptococcus pneumoniae*, *Mol. Microbiol.*, **59**, 551–566.

11. Kloosterman, T. G., Hendriksen, W. T., Bijlsma, J. J. E., *et al.* 2006, Regulation of glutamine and glutamate metabolism by GlnR and GlnA in *Streptococcus pneumoniae*, *J. Biol. Chem.*, **281**, 25097–25109.
12. Puyet, A., Ibañez, A. M. and Espinosa, M. 1993, Characterization of the *Streptococcus pneumoniae* maltosaccharide regulator MalR, a member of the LacI-GalR family of repressors displaying distinctive genetic features, *J. Biol. Chem.*, **268**, 25402–25408.
13. Stroehler, U. H., Kidd, S. P., Stafford, S. L., Jennings, M. P., Paton, J. C. and McEwan, A. G. 2007, A pneumococcal MerR-like regulator and S-nitrosoglutathione reductase are required for systemic virulence, *J. Infect. Dis.*, **196**, 1820–1826.
14. Jakubovics, N. S., Smith, A. W. and Jenkinson, H. F. 2000, Expression of the virulence-related Sca ( $Mn^{2+}$ ) permease in *Streptococcus gordonii* is regulated by a diphtheria toxin metalloregressor-like protein ScaR, *Mol. Microbiol.*, **38**, 140–153.
15. Johnston, J. W., Briles, D. E., Myers, L. E. and Hollingshead, S. K. 2006,  $Mn^{2+}$ -dependent regulation of multiple genes in *Streptococcus pneumoniae* through PsaR and the resultant impact on virulence, *Infect. Immun.*, **74**, 1171–1180.
16. Kloosterman, T. G., Witwicki, R. M., van der Kooi-Pol, M. M., Bijlsma, J. J. E. and Kuipers, O. P. 2008, Opposite effects of  $Mn^{2+}$  and  $Zn^{2+}$  on PsaR-mediated expression of the virulence genes *pcpA*, *prtA*, and *psaBCA* of *Streptococcus pneumoniae*, *J. Bacteriol.*, **190**, 5382–5393.
17. Ulijasz, A. T., Andes, D. R., Glasner, J. D. and Weisblum, B. 2004, Regulation of iron transport in *Streptococcus pneumoniae* by RitR, an orphan response regulator, *J. Bacteriol.*, **186**, 8123–8136.
18. Kloosterman, T. G., van der Kooi-Pol, M. M., Bijlsma, J. J. E. and Kuipers, O. P. 2007, The novel transcriptional regulator SczA mediates protection against  $Zn^{2+}$  stress by activation of the  $Zn^{2+}$ -resistance gene *czcD* in *Streptococcus pneumoniae*, *Mol. Microbiol.*, **65**, 1049–1063.
19. Ramos-Montañez, S., Tsui, H.-C. T., Wayne, K. J., *et al.* 2008, Polymorphism and regulation of the *spxB* (pyruvate oxidase) virulence factor gene by a CBS-HotDog

- domain protein (SpxR) in serotype 2 *Streptococcus pneumoniae*, *Mol. Microbiol.*, **67**, 729–746.
20. Samen, U. M., Eikmanns, B. J. and Reinscheid, D. J. 2006, The transcriptional regulator RovS controls the attachment of *Streptococcus agalactiae* to human epithelial cells and the expression of virulence genes, *Infect. Immun.*, **74**, 5625–5635.
21. Kim, S.-N., Bae, Y.-G. and Rhee, D.-K. 2008, Dual regulation of *dnaK* and *groE* operons by HrcA and Ca<sup>++</sup> in *Streptococcus pneumoniae*, *Arch. Pharm. Res.*, **31**, 462–467.
22. Kwon, H.-Y., Kim, S.-N., Pyo, S.-N. and Rhee, D.-K. 2005, Ca<sup>2+</sup>-dependent expression of the CIRCE regulon in *Streptococcus pneumoniae*, *Mol. Microbiol.*, **55**, 456–468.
23. Lemos, J. A. C., Chen, Y.-Y. M. and Burne, R. A. 2001, Genetic and physiologic analysis of the *groE* operon and role of the HrcA repressor in stress gene regulation and acid tolerance in *Streptococcus mutans*, *J. Bacteriol.*, **183**, 6074–6084.
24. Churchward, G., Bates, C., Gusa, A. A., Stringer, V. and Scott, J. R. 2009, Regulation of streptokinase expression by CovR/S in *Streptococcus pyogenes*: CovR acts through a single high-affinity binding site, *Microbiology*, **155**, 566–575.
25. Federle, M. J. and Scott, J. R. 2002, Identification of binding sites for the group A streptococcal global regulator CovR, *Mol. Microbiol.*, **43**, 1161–1172.
26. Dong, Y., Chen, Y.-Y. M., Snyder, J. A. and Burne, R. A. 2002, Isolation and molecular analysis of the gene cluster for the arginine deiminase system from *Streptococcus gordonii* DL1, *Appl. Environ. Microbiol.*, **68**, 5549–5553.
27. Gruening, P., Fulde, M., Valentin-Weigand, P. and Goethe, R. 2006, Structure, regulation, and putative function of the arginine deiminase system of *Streptococcus suis*, *J. Bacteriol.*, **188**, 361–369.
28. Zeng, L., Dong, Y. and Burne, R. A. 2006, Characterization of *cis*-acting sites controlling arginine deiminase gene expression in *Streptococcus gordonii*, *J. Bacteriol.*, **188**, 941–949.
